# Supplementary material for: Microtubule-based hierarchical porous carbon for lightweight and strong wideband microwave absorption
Source: Royal Society of Chemistry journal article supplement (doi:10.1039/d0tc04486e), 2020-12-10

## Supporting information

**Fig. S1** The photograph of raw wood, pretreated wood, and MHPC.

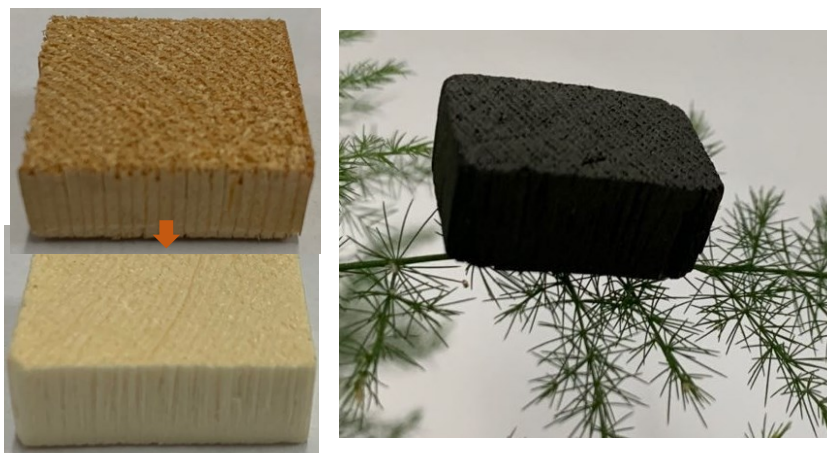

**Fig. S2** The plots of real permittivity and imaginary permittivity versus frequency for MPC.

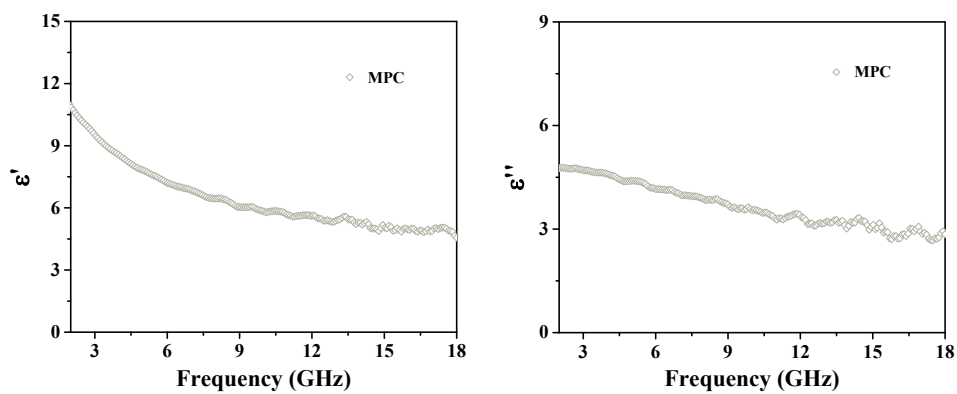

**Fig. S3** The plots of  $\tan\delta_\epsilon$  versus frequency for MPC.

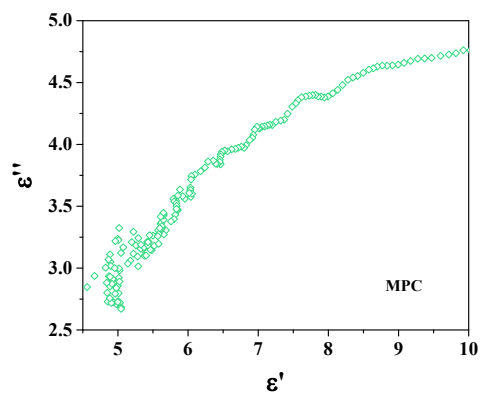

**Fig. S4** The plots of  $\tan\delta_\epsilon$  versus frequency for MPC.

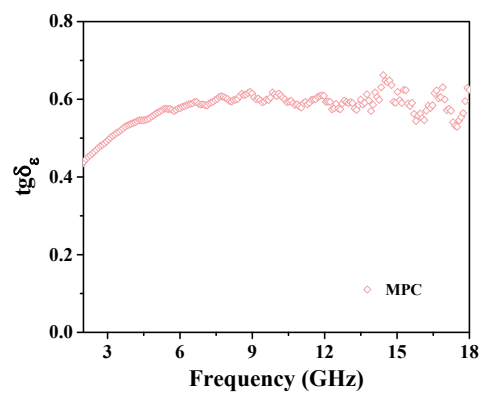

Supplement: d0tc04486e1.pdf [file d0tc04486e1.pdf]
